# Supplementary material for: Interpreting Prevotella and Bacteroides as biomarkers of diet and lifestyle
Source: PubMed Central journal article supplement (PMC4828855; doi:10.1186/s40168-016-0160-7), 2016-04-12

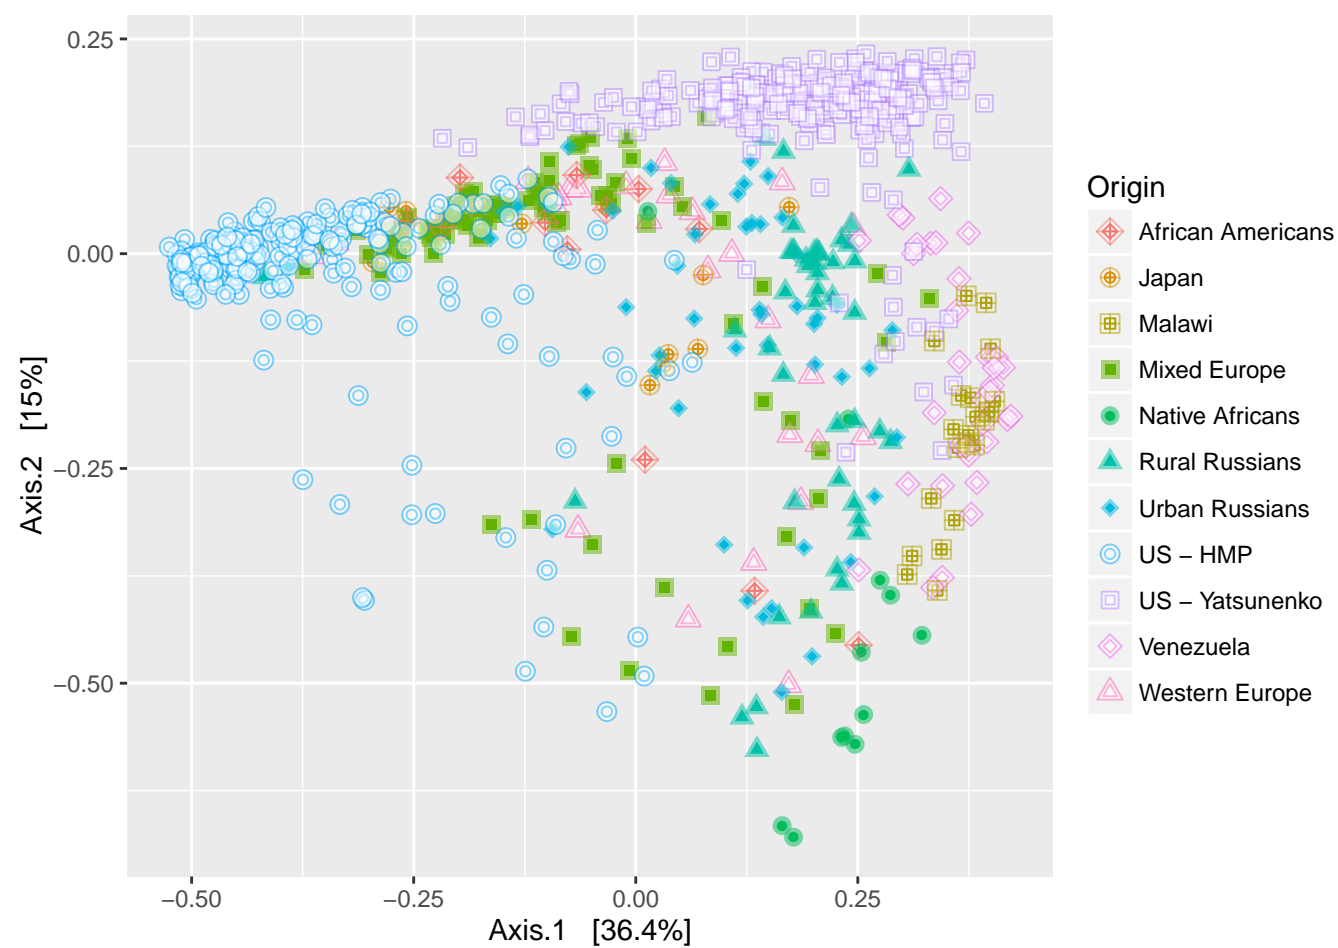

Supplement: 40168_2016_160_MOESM1_ESM.pdf [file 40168_2016_160_MOESM1_ESM.pdf]
